# Supplementary material for: Conversion of C5 carbohydrates into furfural catalyzed by a Lewis acidic ionic liquid in renewable γ-valerolactone
Source: Royal Society of Chemistry journal article supplement (doi:10.1039/c7gc01298e), 2017-01-01
Supplement: c7gc01298e1.pdf [file c7gc01298e1.pdf]

## Electronic supplementary information

### Figures

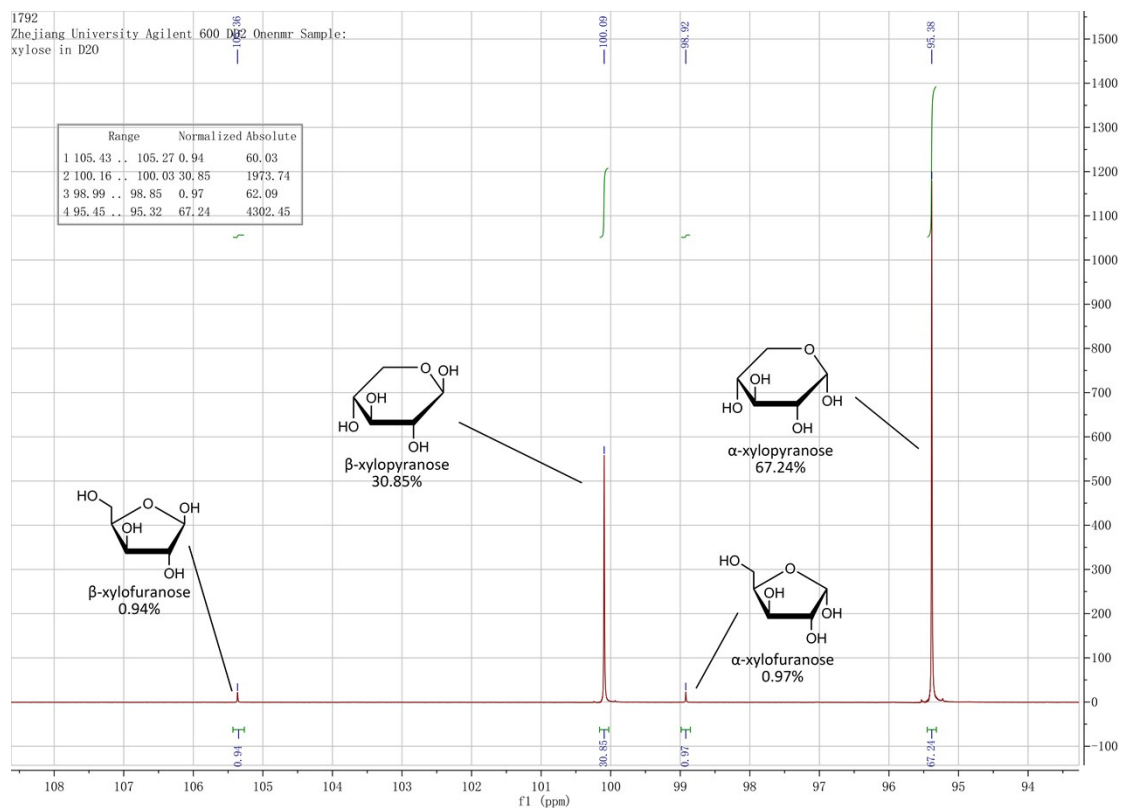

1.  $^{13}\text{C}$ -NMR spectrum for D-[1- $^{13}\text{C}$ ]xylose dissolved in GVL-water (4:1) solvent

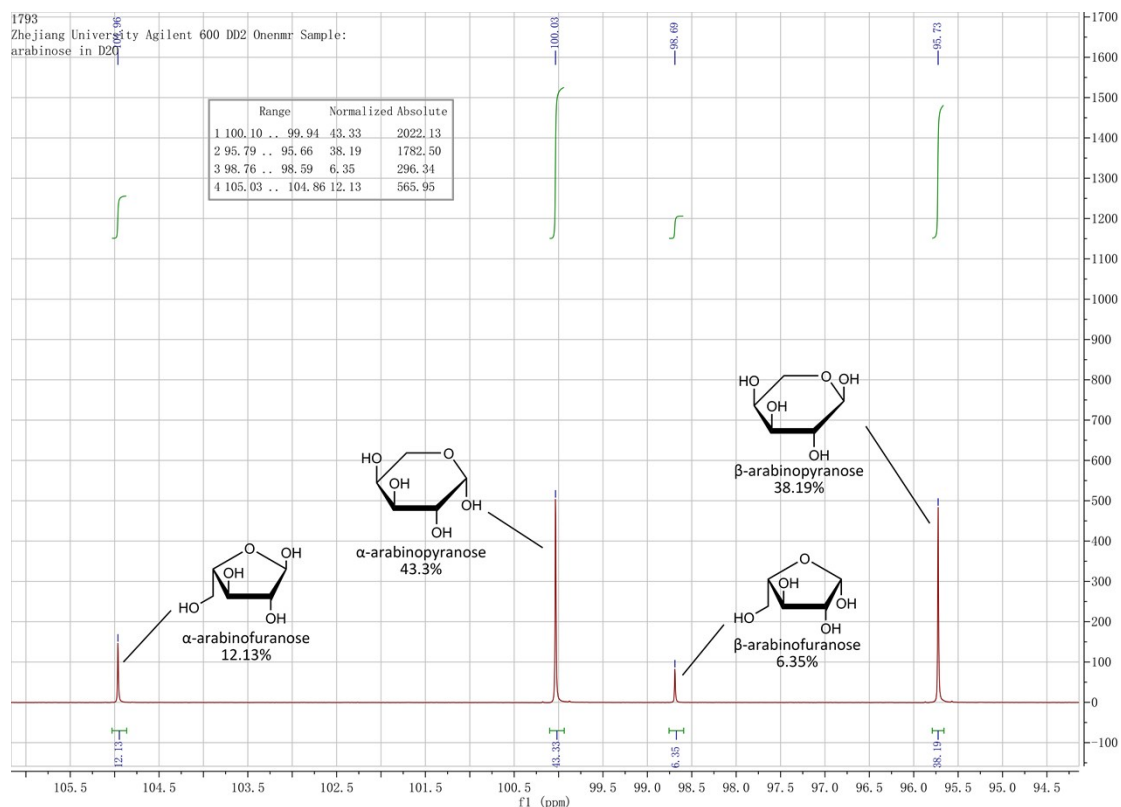

2.  $^{13}\text{C}$ -NMR spectrum for D-[1- $^{13}\text{C}$ ]arabinose dissolved in GVL-water (4:1) solvent

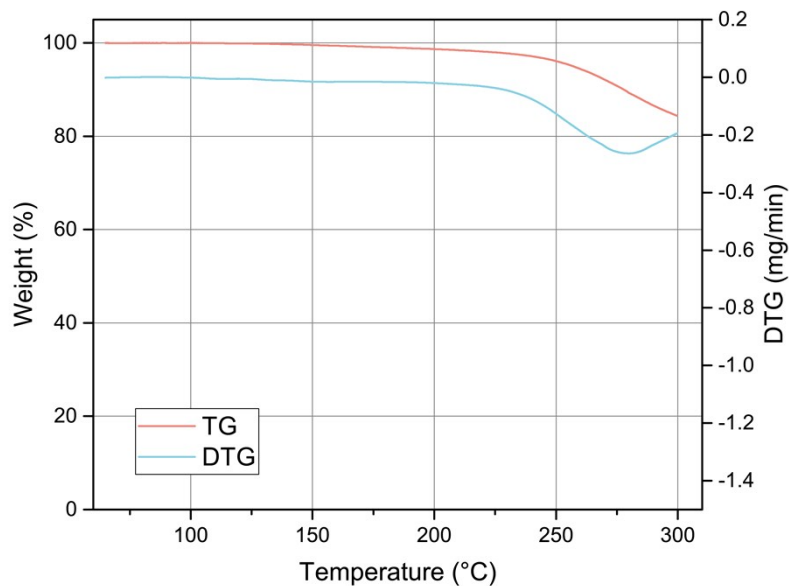

3. TG and DTG curves for [bmim]Cl- $\text{AlCl}_3$

### Thermogravimetric analysis for [bmim]Cl- $\text{AlCl}_3$

Thermogravimetric analysis was carried out in a thermogravimetric analyzer (STA 449F5, Netzsch, Germany) from 65 °C to 300 °C with a heating rate of 10 °C min<sup>-1</sup>. Air with a flow rate of 50 mL min<sup>-1</sup> was used as the carrier gas. 10 mg sample was added into the crucible and was preheated to 110 °C and remained for 10 min in order to remove the moisture.
